# Supplementary material for: How Near-Misses Influence Decision Making Under Risk: A Missed Opportunity for Learning
Source: Atypon-hosted journal article supplement (doi:10.1287/mnsc.1080.0869), 2008-06-11
Supplement: mnsc.1080.0869-sm-ec.pdf [file mnsc.1080.0869-sm-ec.pdf]

**e - c o m p a n i o n**

ONLY AVAILABLE IN ELECTRONIC FORM

Electronic Companion—“How Near-Misses Influence Decision  
Making Under Risk: A Missed Opportunity for Learning”  
by Robin L. Dillon, Catherine H. Tinsley, *Management Science*,  
doi 10.1287/mnsc.1080.0869.

---

## Selected Screen-shots of Experiment

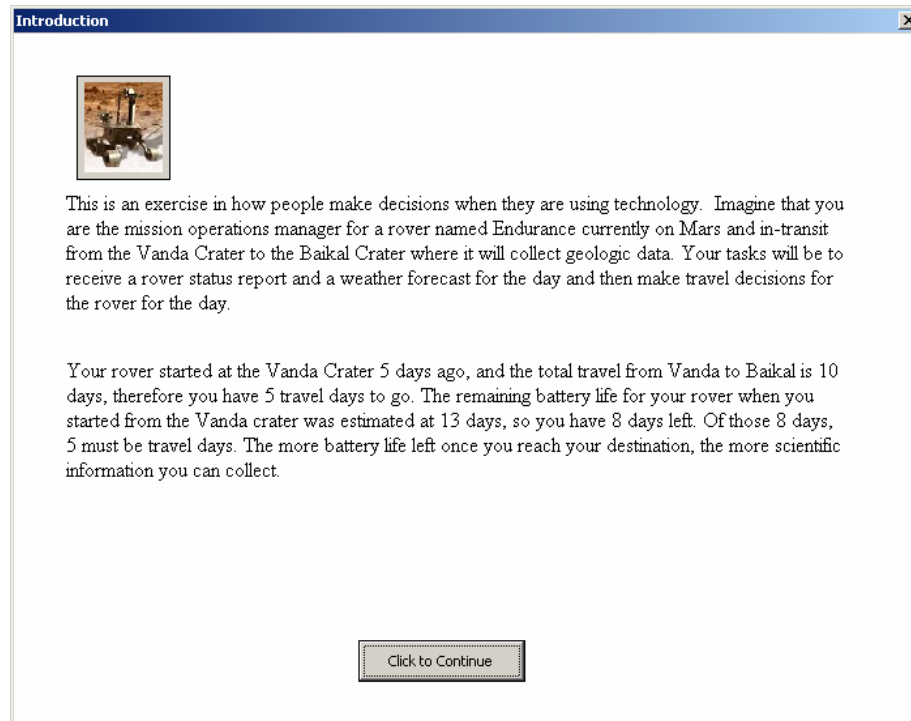

**Figure EC.1 Introductory Screen.**

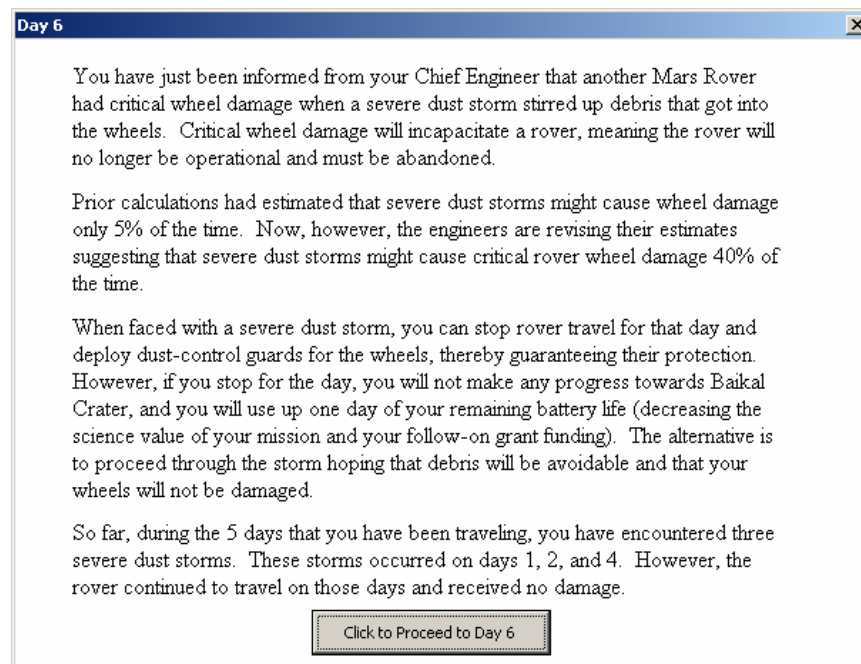

**Figure EC.2 Presentation of Failure Data and “Near-miss” Information for Experiment 2. The last paragraph was not provided to the “No Near-miss” group.**

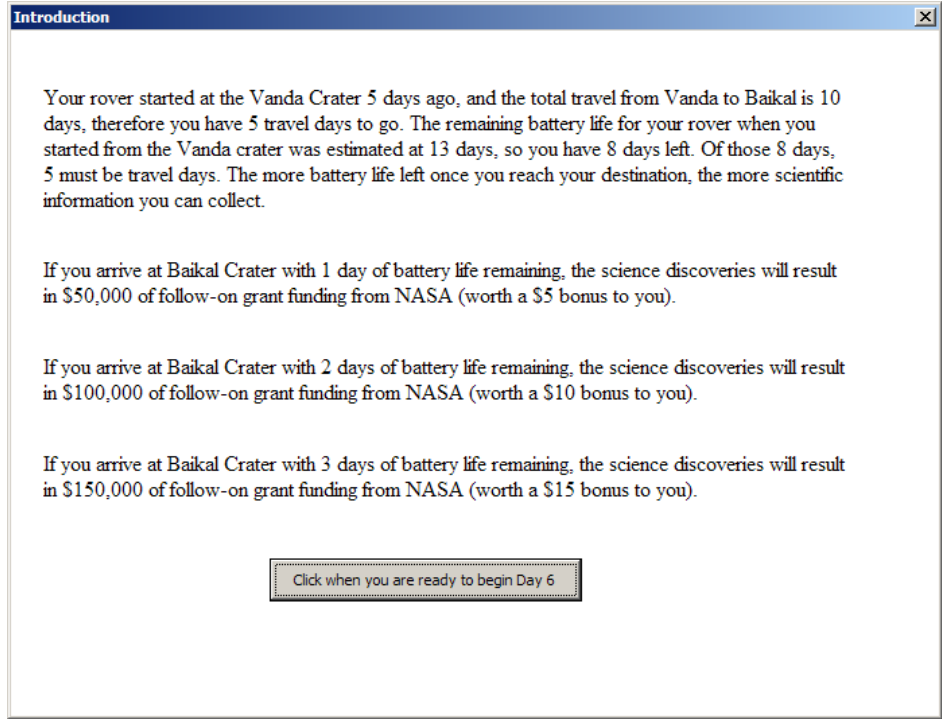

**Figure EC.3** Introductory Material with Description of Payoffs to Students.

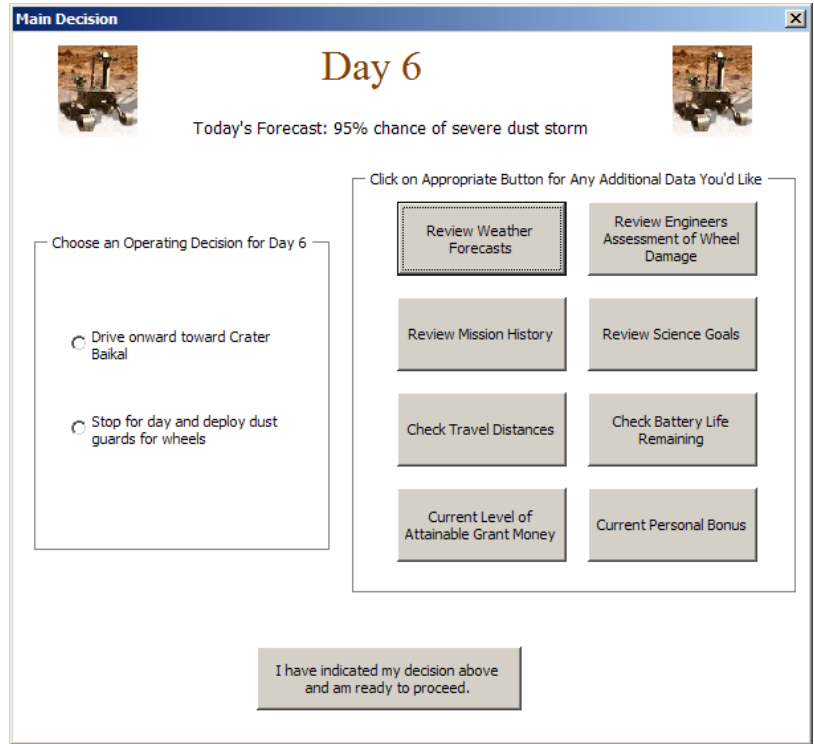

**Figure EC. 4** Main Screen for entering daily operations and Information Buttons.

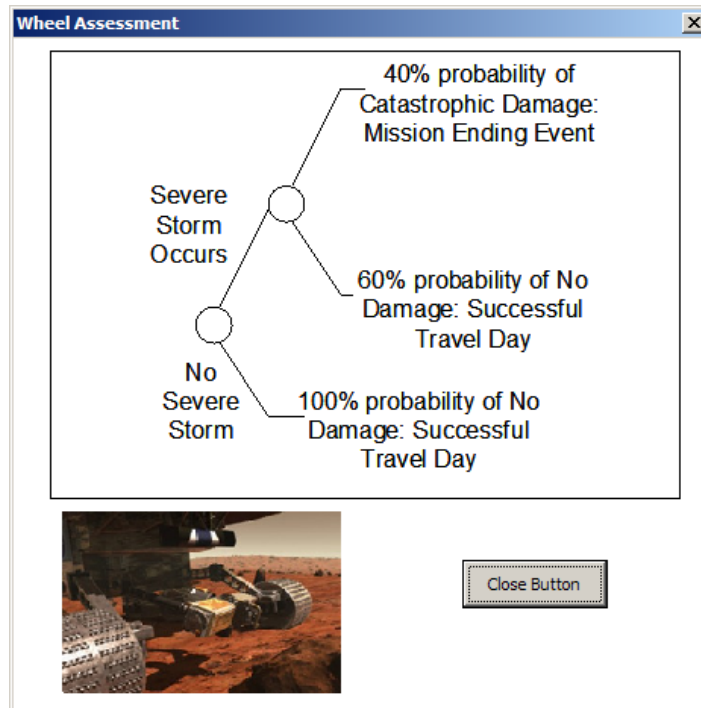

Figure EC.5 Wheel Damage Estimates.
